# Supplementary material for: The double-edged role of FASII regulator FabT in Streptococcus pyogenes infection
Source: PubMed Central journal article supplement — Nat Commun. 2024 Oct 4;15:8593. doi: 10.1038/s41467-024-52637-3 (PMC11452403; doi:10.1038/s41467-024-52637-3), 2024-10-04
Supplement: 41467_2024_52637_MOESM1_ESM.pdf [file 41467_2024_52637_MOESM1_ESM.pdf]

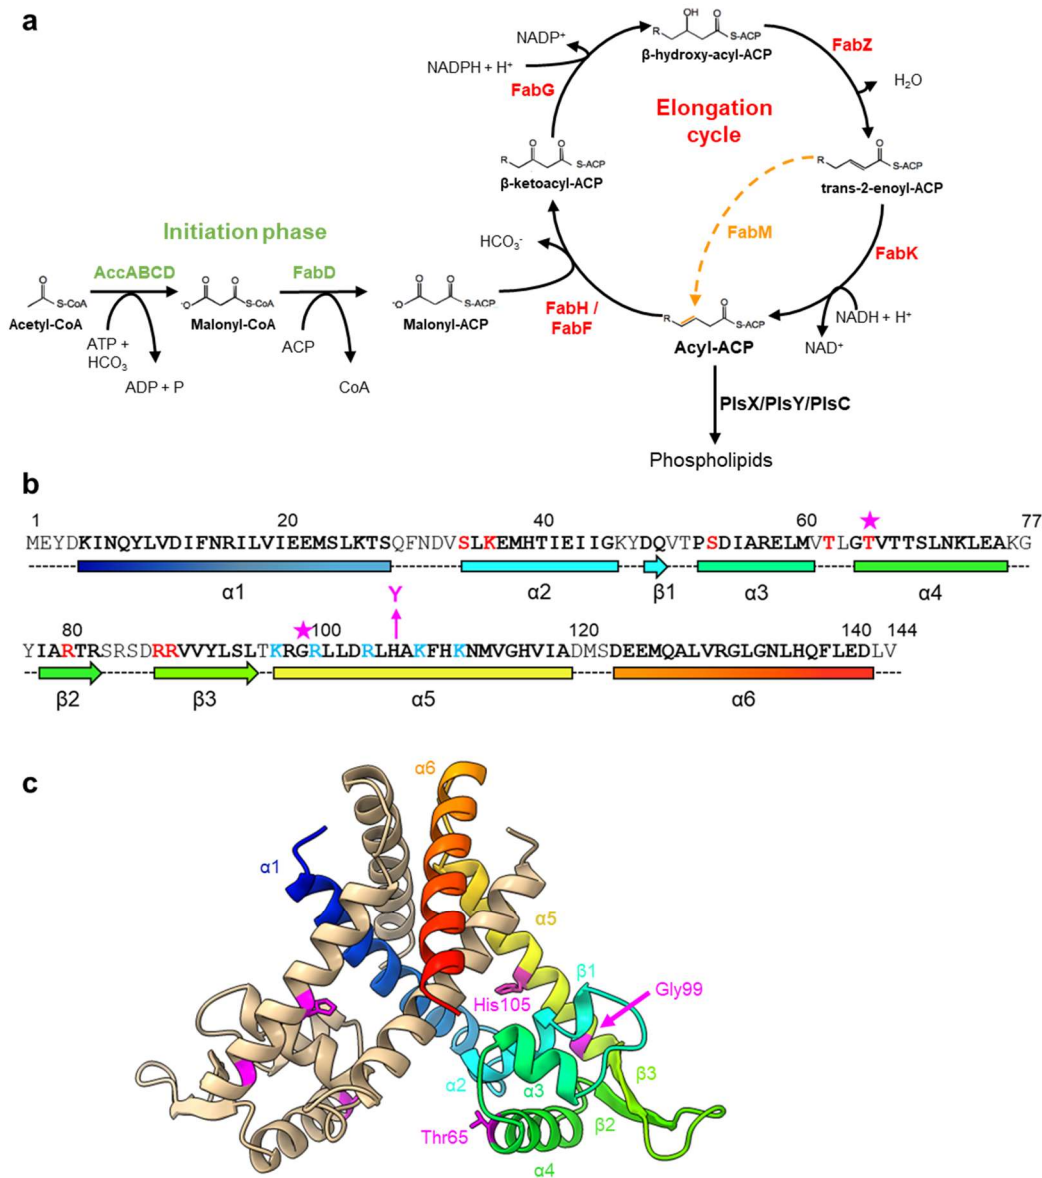

**Supplementary Fig. 1 | FabT regulator and FASII pathway in GAS.** **a**, The FASII synthesis pathway comprises a first initiation phase for precursor synthesis, followed by the recursive elongation cycle. The final product, acyl-ACP, supplies FAs for phospholipid synthesis. FabM (orange) leads to unsaturated *cis* FAs; FabK products are saturated. Initiation phase and elongation cycle enzymes are represented in green and red, respectively. **b**, FabT sequence; amino acids involved in DNA binding are in red, and those interacting with acyl-Acyl carrier protein are in blue. Arrow indicates the His105Tyr FabT mutation studied in this work. Magenta stars highlight amino acids spontaneously mutated *in vivo* and in a saturated-FA environment (this work). **c**, Overall structure of FabT dimer predicted by Alphafold and adapted with ChimeraX<sup>2,3</sup>; one monomer is represented as multicolored (each color designates a separate domain), and the other is beige. Residues Thr65, Gly99 and His105, in magenta, correspond to mutants isolated in this study.

1. Lambert, C., Poyart, C., Gruss, A. & Fouet, A. FabT, a Bacterial Transcriptional Repressor That Limits Futile Fatty Acid Biosynthesis. *Microbiol Mol Biol Rev*, e0002922, doi:10.1128/mmbr.00029-22 (2022).
2. Jumper, J. *et al.* Highly accurate protein structure prediction with AlphaFold. *Nature* **596**, 583-589, doi:10.1038/s41586-021-03819-2 (2021).
3. Pettersen, E. F. *et al.* UCSF ChimeraX: Structure visualization for researchers, educators, and developers. *Protein Sci* **30**, 70-82, doi:10.1002/pro.3943 (2021).

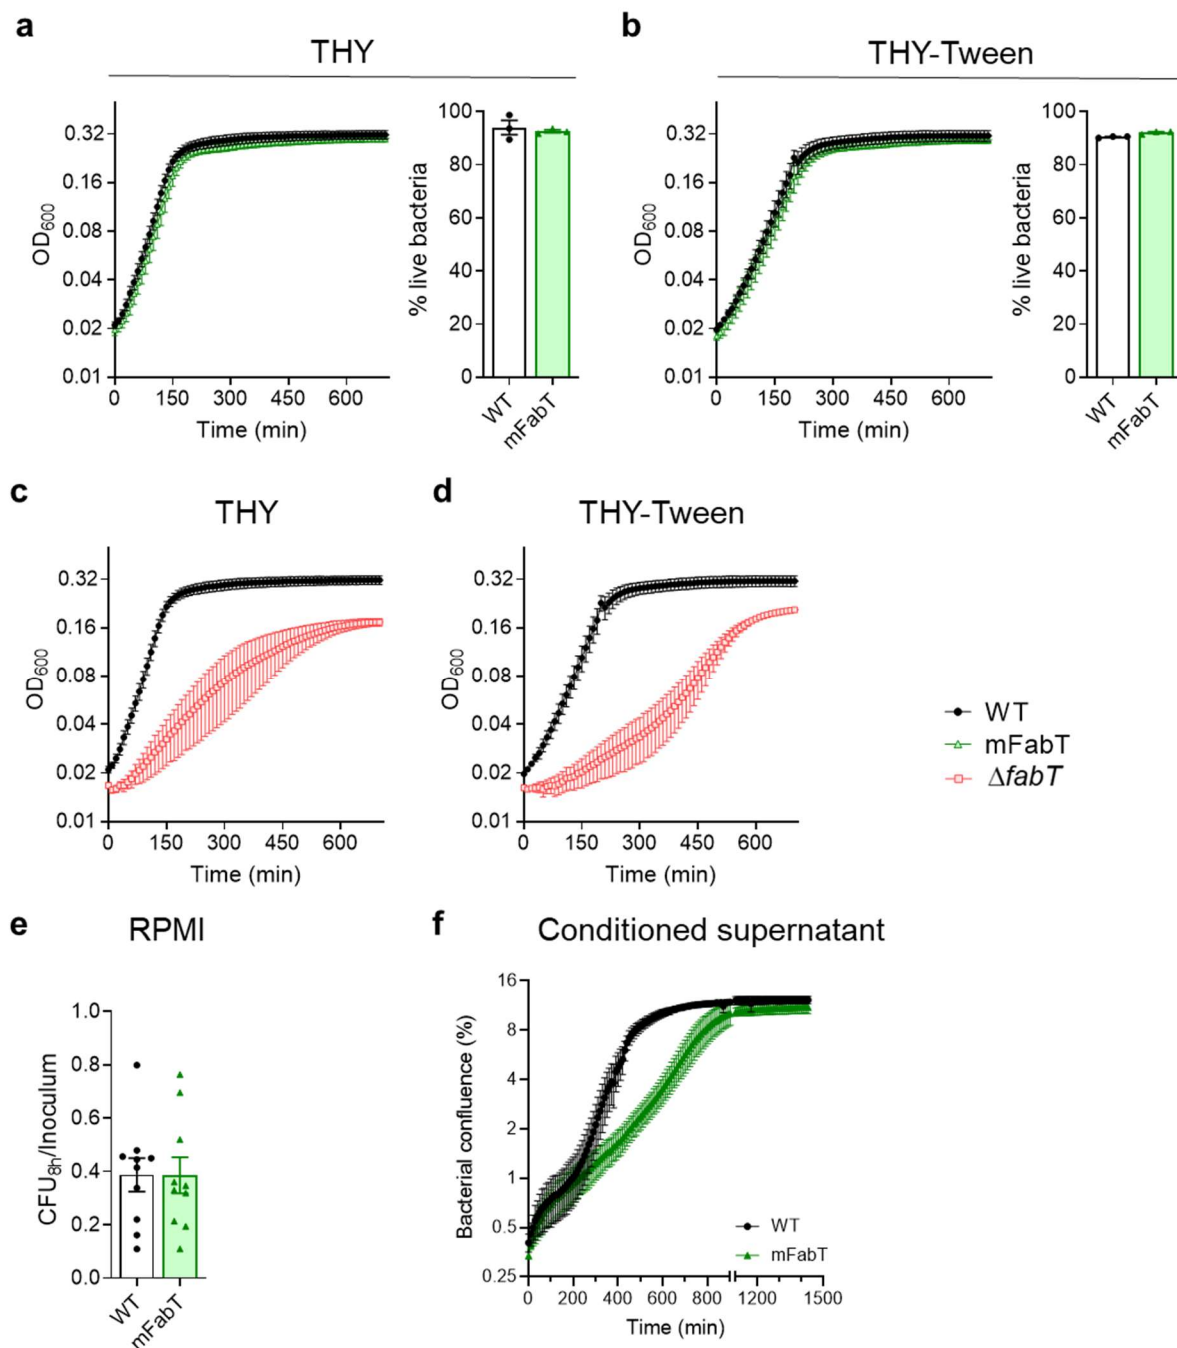

**Supplementary Fig. 2 | Impact of FabT mutations on GAS growth.** **a-d**, WT growth was compared to mFabT (**a** and **b** left; adapted from reference 1) or to  $\Delta fabT$  (**c** and **d**) on THY and THY-Tween. Viability tests (**a** and **b**, right), using the LIVE/DEAD® BacLight™ Bacterial Viability Kit, were performed on WT and mFabT cultures after growth to  $OD_{600} = 0.4 - 0.5$ . Legend at the right of **d** is for growth curves. **e**, Ratios of CFUs of WT or mFabT strains after 8 h over respective initial inocula ( $10^3/\text{ml}$  for each) in RPMI medium; ratio below 1 indicates that bacteria die. **f**, Real-time growth of WT and mFabT in endometrial conditioned supernatant followed using Live-Cell Analysis System (IncuCyte®, Sartorius) and the Basic analyzer. **a-d**, **e**,  $N=3$ ; **f**  $N=10$ ; differences in **a**, **b**, and **e** were not statistically significant using T-test. WT, black lines or white bars; mFabT, green lines or bars. **a**, **b**, **e**, Outliers were searched using ROUT method (GraphPad), with  $Q=1\%$ . WT, black lines or white bars; mFabT, green lines or bars. Source data for **a**, **b**, **c**, **d**, **e** and **f** are provided as a Source Data file.

**a**

MGDG

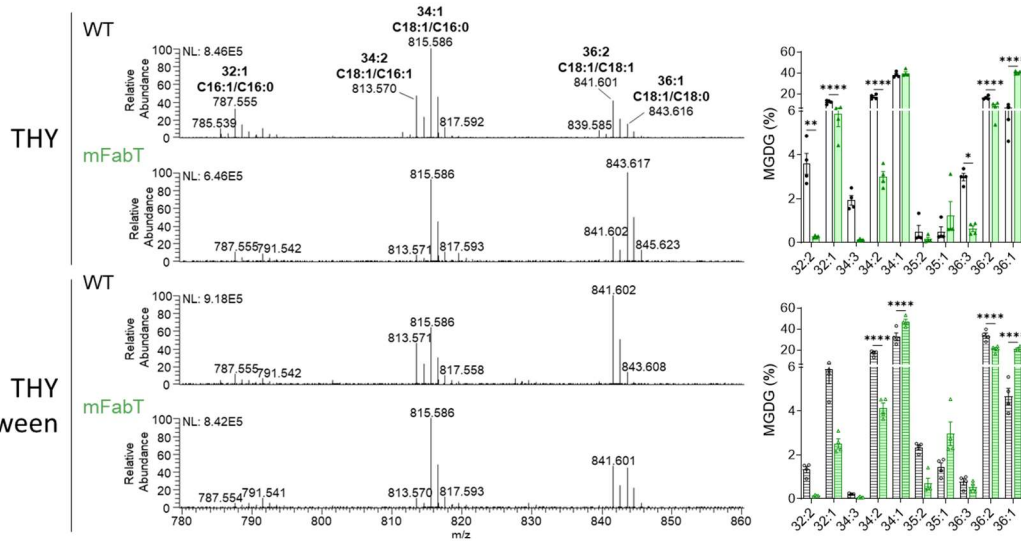

**b**

DGDG

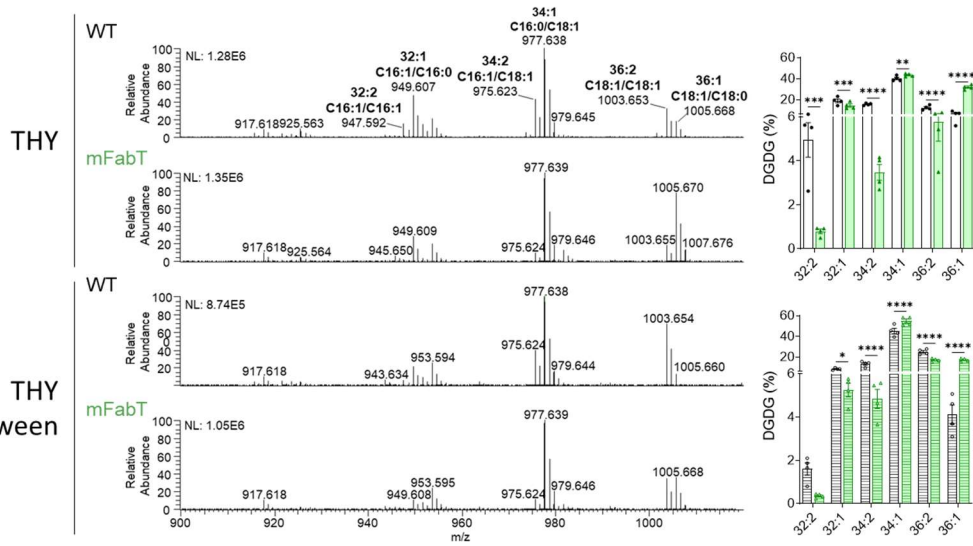

**c**

PG

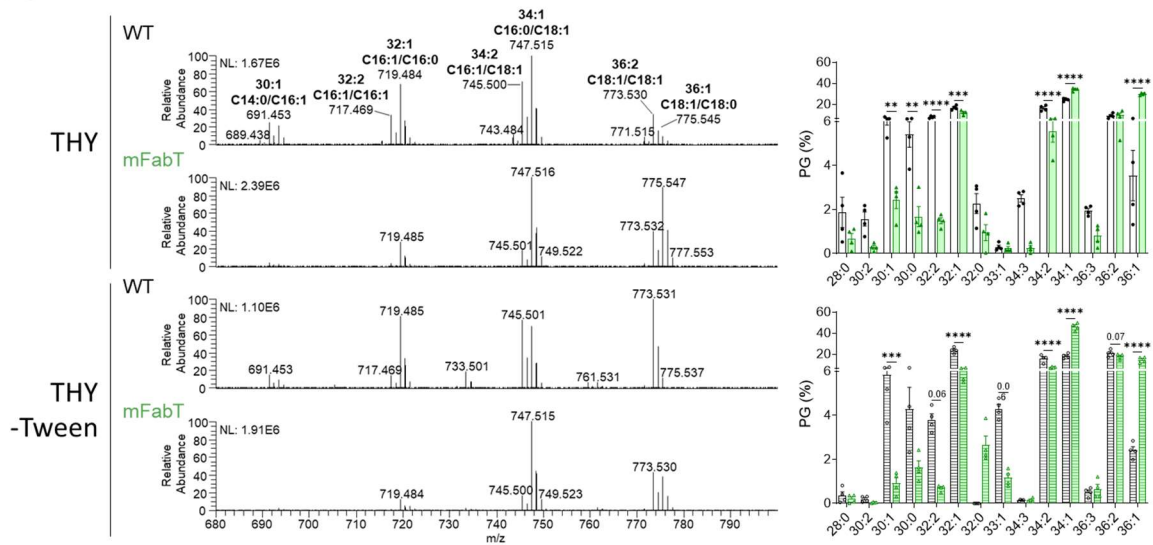

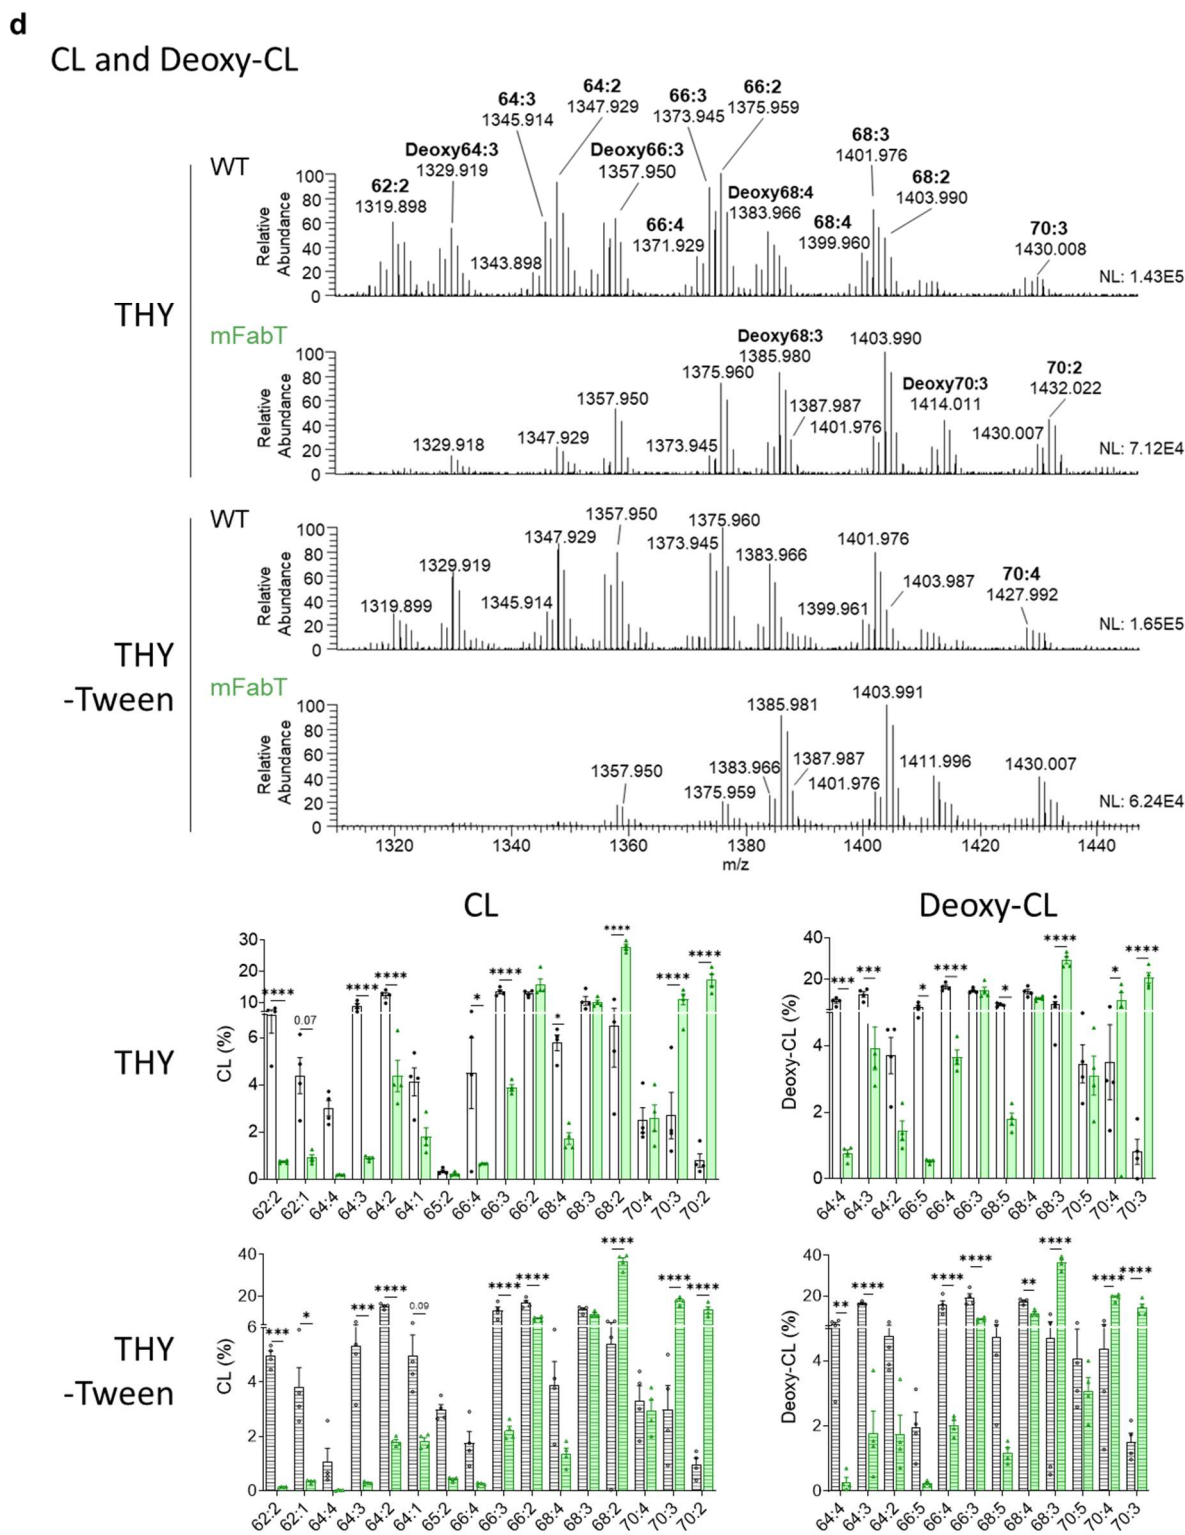

**Supplementary Fig. 3 | Phospholipid membrane composition.** Identification of **a**, monoglucosyldiacylglycerol (MGDG), **b**, diglucosyldiacylglycerol (DGDG), **c**, phosphatidylglycerol (PG), **d**, cardiolipin (CL) and putative deoxidized cardiolipin (Deoxy-CL). For each class, lipids are presented as the percentage of total lipids, and are quantified in Supplementary Table 2. For **a**, **b**, and **c**, fatty acid assignments are presented directly on mass spectrometry analyses. Cardiolipin assignments were ambiguous and are not shown. Lipids were analyzed on 3 independently prepared culture extracts (N=3). Statistical values were determined using 2-way ANOVA, Bonferroni post-test. \*p<0.05; \*\*p<0.01; \*\*\*p<0.001; \*\*\*\*p<0.0001. Strains were grown in THY (open bars) and THY-Tween (hatched bars). WT, black lines and white bars; mFabT, green lines and bars. Source data are provided as a Source Data file.

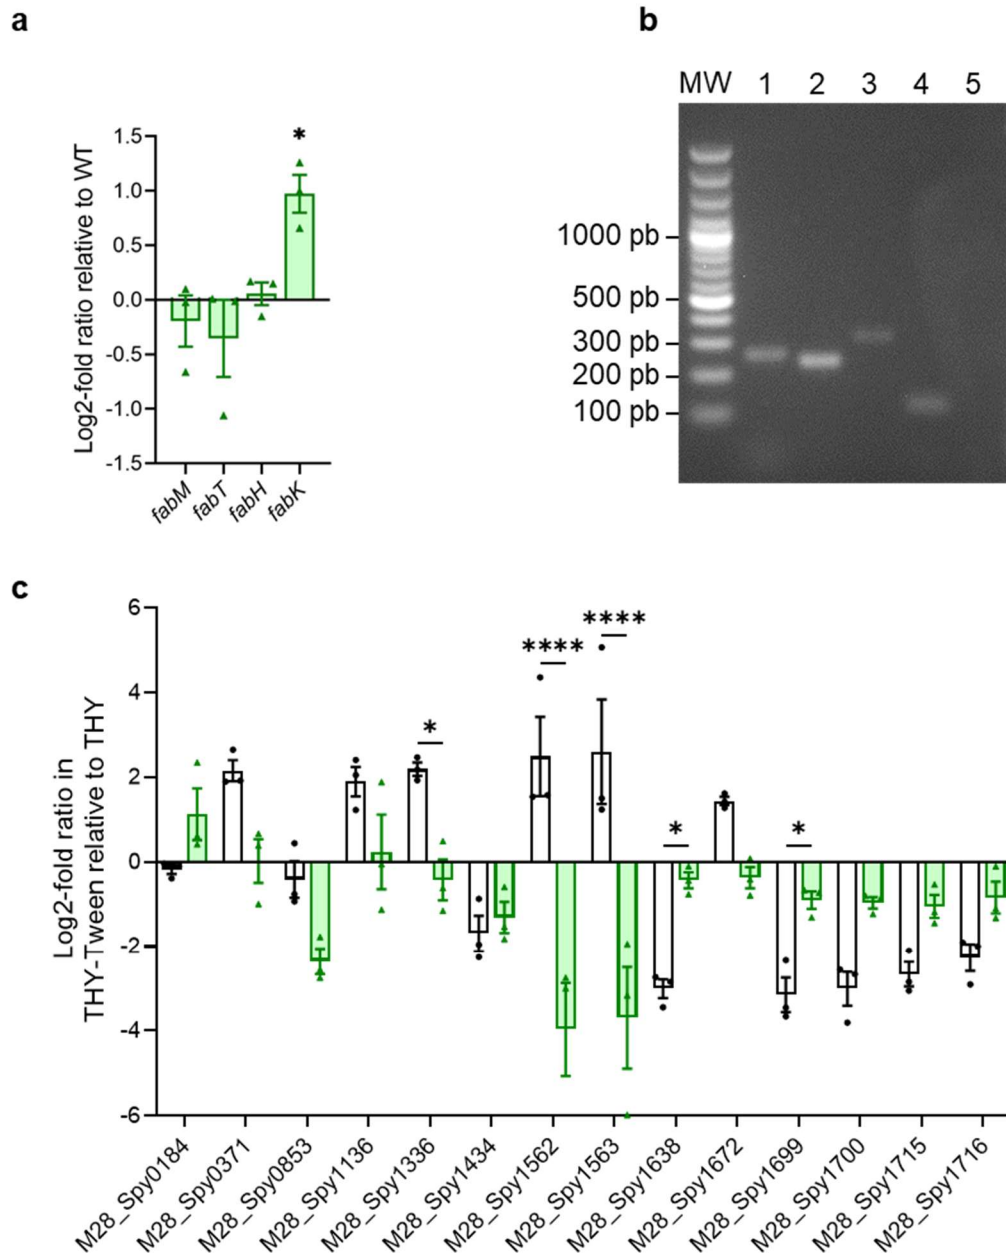

**Supplementary Fig. 4 | Impact of mFabT on FASII and non-FASII gene expression in the absence of FA supplementation.** **a-c**, WT and mFabT strains were grown in THY medium. **a**, **c**, RNAs were quantified by qRT-PCR. Expression was normalized to that of *gyrA*; relative gene expression is expressed as the log<sub>2</sub>-fold ratio. **a**, FASII gene expression of mFabT relative to WT is reproduced from Reference 1. **b**, mRNA transcript analysis of FASII locus genes: agarose gel of PCR amplification products on cDNA using primer pairs from neighboring genes. MW, molecular weight reference (Generuler 100 bp, ThermoFisher Scientific). Lane 1, *fabM-fabT* (234 bp); 2, *fabH-acpA* (221 bp); 3, *acpA-fabK* (302 bp); 4, *fabZ-accC* (105 bp); 5, *accD-serS* (288 bp). Results confirm the FASII transcriptional units indicated in Fig. 2a. **c**, expression of non-FASII genes in WT and mFabT strains (see Supplementary Table 1 for gene assignments). The relative gene expression is expressed as the log<sub>2</sub>-fold ratio in a given strain grown in THY-Tween vs in THY. \*, significance of differences in the two media between WT and mFabT. In **a-c**, WT, white bars; mFabT, green bars. **a**, **b**, N=4; **c**, N=3. **a-c**, 2-way ANOVA, Bonferroni post-test \**p*<0.05; \*\*\*\**p*<0.0001. **c**, expression of non-FASII genes in WT and mFabT strains (see Supplementary Table 1 for gene assignments). In **a-c**, WT, white bars; mFabT, green bars. **a**, **b**, N=4; **c**, N=3. **a-c**, 2-way ANOVA, Bonferroni post-test \**p*<0.05; \*\*\*\**p*<0.0001. Source data for **a** and **c** are provided as a Source Data file.

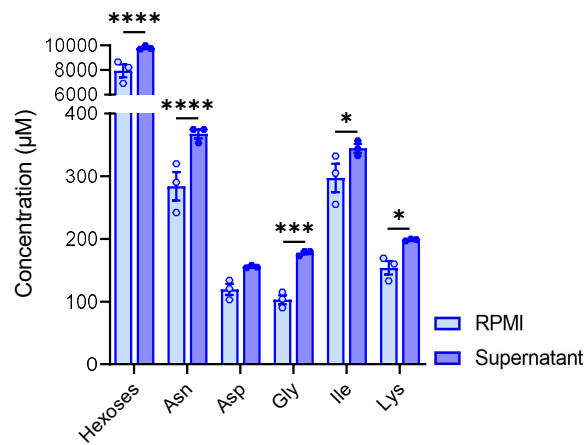

**Supplementary Fig. 5 | Carbohydrates and amino acid residues produced by human endometrial cells.** Metabolomic analysis of RPMI and HEC-1-A conditioned supernatants, as per legend at right. (see Supplementary Table 5 for complete data). N=3, 2-way ANOVA, Bonferroni post-test; \*p<0.05; \*\*\*p<0.005; \*\*\*\*p<0.001.

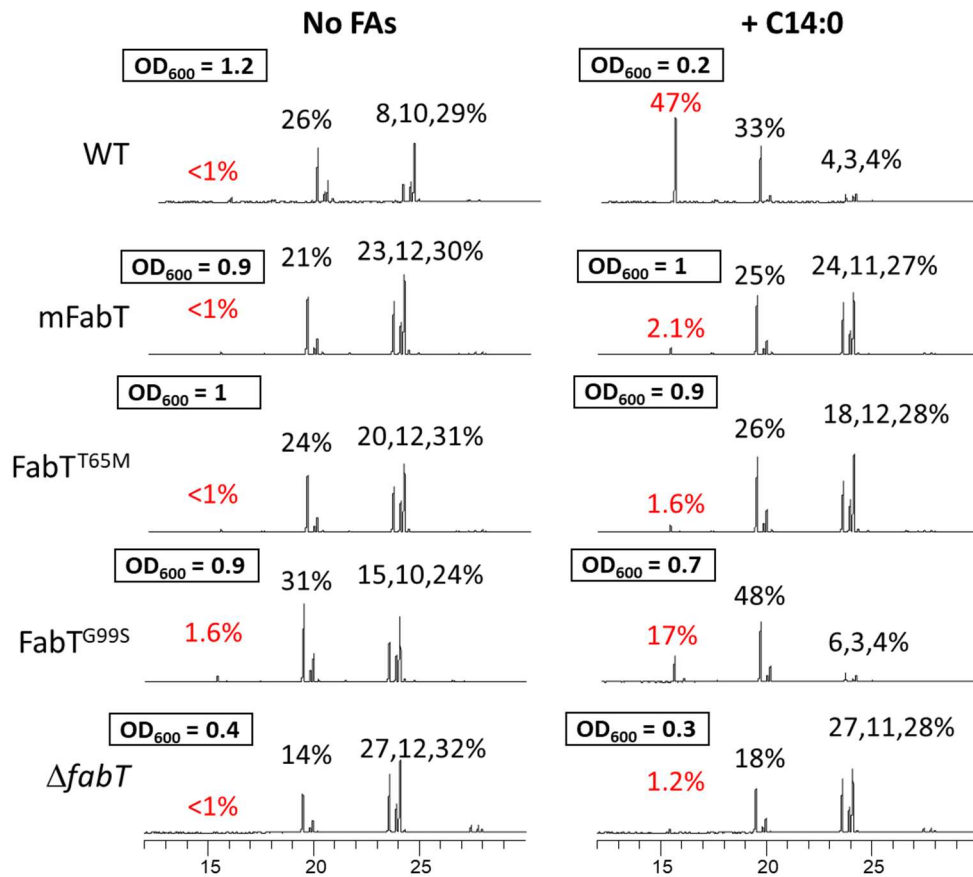

**Supplementary Fig. 6. FabT mutant growth and FA profiles in the absence and presence of exogenous C14:0.** Triplicate cultures of the two isolated *fabT* mutants (FabT<sup>T65M</sup> and FabT<sup>G99S</sup>) and controls (WT, mFabT,  $\Delta fabT$ ) were prepared in BHI medium with 0.025 % BSA. Medium was without (left column), or with 100  $\mu$ M C14:0 (right column). OD<sub>600</sub> is shown for each strain and both conditions after 4 h growth (boxed). For each strain, proportions of C14:0 present in FA profiles of WT and *fabT* mutant strains are in red; proportions, from left to right, of C16:0, C18:0, C18:1 $\Delta$ 9 and C18:1 $\Delta$ 11 are in black.

Supplementary Table 1. Effects of FabT mutation on fatty acid (FA) composition.

| Fatty acids <sup>a</sup> | Cultivated in    |                    |                   |                  |                    |                   | <i>p</i> -value  |         |              |
|--------------------------|------------------|--------------------|-------------------|------------------|--------------------|-------------------|------------------|---------|--------------|
|                          | THY              |                    |                   | THY-Tween        |                    |                   | THY-Tween vs THY |         |              |
|                          | WT <sup>c</sup>  | mFabT <sup>c</sup> | <i>ΔfabT</i>      | WT <sup>c</sup>  | mFabT <sup>c</sup> | <i>ΔfabT</i>      | WT               | mFabT   | <i>ΔfabT</i> |
| C14:0                    | 1.9 ± 0.8        | 0.6 ± 0.1          | 0.3 ± 0.1         | 8.1 ± 2.2        | 0.9 ± 0.1          | 0.4 ± 0.2         | <0.0001          | >0.9999 | >0.9999      |
| C16:0                    | 29.2 ± 2.3       | <b>21.2 ± 2.6</b>  | <b>15.2 ± 3.2</b> | 21.2 ± 5.8       | <b>27.1 ± 2.0</b>  | <b>10.5 ± 1.2</b> | <0.0001          | 0.0001  | 0.0067       |
| C16:1                    | 17.0 ± 0.5       | 7.9 ± 1.8          | 3.6 ± 1.4         | 8.3 ± 1.6        | 4.6 ± 0.4          | 2.0 ± 0.2         | <0.0001          | 0.0694  | >0.9999      |
| <b>C18:0</b>             | <b>6.8 ± 0.7</b> | <b>26.1 ± 0.7</b>  | <b>26.1 ± 0.5</b> | <b>0.2 ± 0.3</b> | <b>12.4 ± 0.8</b>  | <b>26.3 ± 0.4</b> | <0.0001          | <0.0001 | >0.9999      |
| C18:1Δ9                  | 9.1 ± 2.4        | 10.8 ± 2.0         | 11.7 ± 0.2        | 54.8 ± 3.3       | 30.4 ± 1.5         | 15.0 ± 0.1        | <0.0001          | <0.0001 | 0.1008       |
| C18:1Δ11                 | 29.1 ± 1.3       | <b>28.9 ± 1.2</b>  | <b>31.6 ± 2.3</b> | 3.4 ± 3.0        | <b>20.1 ± 1.9</b>  | <b>30.5 ± 0.4</b> | <0.0001          | <0.0001 | >0.9999      |
| others <sup>b</sup>      | 6.8 ± 1.5        | 4.5 ± 1.2          | 11.5 ± 1.7        | 4.2 ± 2.8        | 4.5 ± 1.6          | 15.3 ± 0.9        | 0.263            | >0.9999 | 0.0394       |
| (C18):(C16) <sup>c</sup> | 1.0              | 2.3                | 3.7               | 2.0              | 2.0                | 5.8               | 0.0092           | 0.5304  | 0.974        |
| UFA:SFA <sup>d</sup>     | 1.5              | 1.0                | 1.1               | 2.3              | 1.4                | 1.3               | 0.0577           | 0.6405  | >0.9999      |

<sup>a</sup> Percent of total FAs. <sup>b</sup> FAs that represent less than 2 % total FAs. <sup>c</sup> Ratio of chain lengths = (C18:0 + C18:1)/(C16:0 + C16:1). <sup>d</sup> Ratio unsaturated/saturated FAs = (C16:1 + C18:1Δ9 + C18:1Δ11)/(C14:0 + C16:0 + C18:0). <sup>e</sup> As reported in reference 1. In bold, percent saturated FA C18:0, a main FA with increased proportions in mFabT. See reference 2 for studies in *Streptococcus pneumoniae*. In blue, differences between mFabT and *ΔfabT* are highlighted. 2-way ANOVA, Bonferroni post-test.

Source data are provided as a Source Data file.

- Lambert C, d'Orfani, A, Gaillard M, Zhang Q, Gloux K, Poyart C, Fouet A. Acyl-AcpB, a FabT co-repressor in *Streptococcus pyogenes*. J Bacteriol 205, e00274-23, doi: 10.1128/jb.00274-23 (2023).
- Lu YJ, and Rock CO. Transcriptional regulation of fatty acid biosynthesis in *Streptococcus pneumoniae*. Mol Microbiol 59:551-66 (2006).



Supplementary Table 2. Membrane lipid composition.

| Lipids <sup>a</sup>     | m/z     | Relative abundance (%) |            |                         |            | P-value          |         |
|-------------------------|---------|------------------------|------------|-------------------------|------------|------------------|---------|
|                         |         | Cultivated in THY      |            | Cultivated in THY-Tween |            | THY-Tween vs THY |         |
|                         |         | WT                     | mFabT      | WT                      | mFabT      | WT               | mFabT   |
| <b>MGDG species</b>     |         |                        |            |                         |            |                  |         |
| 32:2                    | 785.54  | 3.6 ± 1.0              | 0.3 ± 0.1  | 1.3 ± 0.3               | 0.1 ± 0.0  | >0.9999          | >0.9999 |
| 32:1                    | 787.56  | 12.1 ± 1.8             | 5.9 ± 1.2  | 5.9 ± 1.4               | 2.5 ± 0.4  | 0.0136           | <0.0001 |
| 34:3                    | 811.56  | 1.9 ± 0.4              | 0.1 ± 0.0  | 0.2 ± 0.1               | 0.1 ± 0.0  | >0.9999          | >0.9999 |
| 34:2                    | 813.57  | 17.2 ± 2.2             | 3.0 ± 0.5  | 17.0 ± 2.6              | 4.1 ± 0.5  | >0.9999          | 0.8522  |
| 34:1                    | 815.59  | 38.2 ± 2.5             | 39.7 ± 3.0 | 32.6 ± 7.4              | 46.9 ± 4.6 | 0.0138           | <0.0001 |
| 35:2                    | 827.59  | 0.5 ± 0.6              | 0.2 ± 0.2  | 2.4 ± 0.2               | 0.7 ± 0.5  | >0.9999          | >0.9999 |
| 35:1                    | 829.60  | 0.5 ± 0.4              | 1.3 ± 1.3  | 1.4 ± 0.4               | 3.0 ± 1.1  | >0.9999          | 0.105   |
| 36:3                    | 839.59  | 3.0 ± 0.3              | 0.6 ± 0.3  | 0.8 ± 0.3               | 0.5 ± 0.2  | >0.9999          | >0.9999 |
| 36:2                    | 841.60  | 16.3 ± 1.7             | 8.7 ± 2.7  | 33.7 ± 5.0              | 20.7 ± 3.1 | <0.0001          | <0.0001 |
| 36:1                    | 843.62  | 6.7 ± 2.2              | 40.3 ± 1.4 | 4.7 ± 0.7               | 21.2 ± 1.8 | >0.9999          | <0.0001 |
| <b>DGDG species</b>     |         |                        |            |                         |            |                  |         |
| 32:2                    | 947.59  | 4.9 ± 1.6              | 0.8 ± 0.2  | 1.6 ± 0.6               | 0.4 ± 0.1  | 0.1369           | >0.9999 |
| 32:1                    | 949.61  | 18.8 ± 3.6             | 14.3 ± 3.1 | 8.4 ± 1.0               | 5.3 ± 0.6  | <0.0001          | <0.0001 |
| 34:2                    | 975.62  | 15.5 ± 1.0             | 3.5 ± 0.7  | 13.3 ± 2.7              | 4.8 ± 0.9  | 0.7991           | >0.9999 |
| 34:1                    | 977.64  | 40.1 ± 2.5             | 43.3 ± 1.5 | 45.1 ± 5.3              | 54.9 ± 3.9 | 0.0043           | <0.0001 |
| 36:2                    | 1003.65 | 12.3 ± 2.1             | 5.8 ± 1.8  | 25.1 ± 2.5              | 17.1 ± 1.5 | <0.0001          | <0.0001 |
| 36:1                    | 1005.67 | 7.1 ± 1.4              | 31.8 ± 2.2 | 4.1 ± 0.9               | 17.2 ± 1.5 | 0.2587           | <0.0001 |
| <b>PG species</b>       |         |                        |            |                         |            |                  |         |
| 28:0                    | 665.44  | 1.9 ± 1.4              | 0.7 ± 0.5  | 0.4 ± 0.3               | 0.2 ± 0.2  | >0.9999          | >0.9999 |
| 30:2                    | 689.44  | 1.6 ± 0.6              | 0.3 ± 0.2  | 0.2 ± 0.1               | 0.0 ± 0.0  | >0.9999          | >0.9999 |
| 30:1                    | 691.45  | 6.4 ± 1.1              | 2.4 ± 0.8  | 5.8 ± 1.8               | 0.9 ± 0.5  | >0.9999          | 0.1678  |
| 30:0                    | 693.47  | 5.4 ± 1.2              | 1.7 ± 0.9  | 4.3 ± 2.0               | 1.6 ± 0.6  | >0.9999          | >0.9999 |
| 32:2                    | 717.47  | 7.8 ± 1.0              | 1.5 ± 0.3  | 3.8 ± 0.5               | 0.7 ± 0.1  | 0.0153           | >0.9999 |
| 32:1                    | 719.48  | 16.7 ± 2.0             | 12.1 ± 2.1 | 23.5 ± 2.7              | 6.2 ± 0.7  | <0.0001          | <0.0001 |
| 32:0                    | 721.50  | 2.3 ± 0.9              | 0.9 ± 0.7  | 0.0                     | 2.6 ± 0.8  | 0.8064           | 0.0995  |
| 33:1                    | 733.50  | 0.3 ± 0.2              | 0.2 ± 0.2  | 4.3 ± 0.4               | 1.2 ± 0.4  | 0.0232           | >0.9999 |
| 34:3                    | 743.48  | 2.5 ± 0.3              | 0.3 ± 0.2  | 0.1 ± 0.0               | 0.2 ± 0.1  | 0.6926           | >0.9999 |
| 34:2                    | 745.50  | 16.2 ± 2.6             | 5.6 ± 1.0  | 15.8 ± 3.6              | 7.4 ± 0.6  | >0.9999          | 0.0983  |
| 34:1                    | 747.51  | 24.4 ± 1.3             | 34.1 ± 1.5 | 18.2 ± 2.3              | 46.1 ± 3.5 | <0.0001          | <0.0001 |
| 36:3                    | 771.51  | 2.0 ± 0.2              | 0.8 ± 0.5  | 0.5 ± 0.2               | 0.7 ± 0.4  | >0.9999          | >0.9999 |
| 36:2                    | 773.53  | 9.0 ± 2.2              | 9.6 ± 3.8  | 20.7 ± 3.3              | 17.6 ± 2.5 | <0.0001          | <0.0001 |
| 36:1                    | 775.55  | 3.5 ± 2.3              | 29.8 ± 1.1 | 2.4 ± 0.4               | 14.6 ± 2.6 | >0.9999          | <0.0001 |
| <b>CL species</b>       |         |                        |            |                         |            |                  |         |
| 62:2                    | 1319.90 | 4.8 ± 1.2              | 0.5 ± 0.1  | 3.3 ± 0.2               | 0.1 ± 0.0  | >0.9999          | >0.9999 |
| 62:1                    | 1321.91 | 3.0 ± 1.2              | 0.6 ± 0.2  | 2.5 ± 0.9               | 0.2 ± 0.1  | >0.9999          | >0.9999 |
| 64:4                    | 1343.90 | 2.1 ± 0.4              | 0.1 ± 0.0  | 0.7 ± 0.6               | 0.0 ± 0.0  | >0.9999          | >0.9999 |
| 64:3                    | 1345.91 | 6.1 ± 1.1              | 0.6 ± 0.1  | 3.5 ± 1.2               | 0.2 ± 0.0  | 0.1157           | >0.9999 |
| 64:2                    | 1347.93 | 8.5 ± 1.4              | 2.8 ± 0.9  | 10.1 ± 0.2              | 1.1 ± 0.1  | 0.8048           | 0.1591  |
| 64:1                    | 1349.95 | 2.9 ± 0.9              | 1.1 ± 0.5  | 3.3 ± 1.0               | 1.1 ± 0.2  | >0.9999          | >0.9999 |
| 65:2                    | 1361.95 | 0.2 ± 0.1              | 0.1 ± 0.1  | 2.0 ± 0.2               | 0.3 ± 0.1  | 0.7997           | >0.9999 |
| 66:4                    | 1371.93 | 3.1 ± 2.0              | 0.4 ± 0.0  | 1.2 ± 0.5               | 0.2 ± 0.0  | 0.6299           | >0.9999 |
| 66:3                    | 1373.94 | 9.3 ± 0.7              | 2.5 ± 0.2  | 8.7 ± 2.3               | 1.4 ± 0.2  | >0.9999          | >0.9999 |
| 66:2                    | 1375.96 | 8.9 ± 0.9              | 9.9 ± 2.5  | 11.1 ± 1.3              | 5.7 ± 0.3  | 0.1184           | <0.0001 |
| 68:4                    | 1399.96 | 4.0 ± 0.3              | 1.1 ± 0.3  | 2.6 ± 1.1               | 0.8 ± 0.3  | >0.9999          | >0.9999 |
| 68:3                    | 1401.98 | 7.3 ± 1.8              | 6.4 ± 0.8  | 9.1 ± 1.4               | 7.0 ± 0.6  | 0.454            | >0.9999 |
| 68:2                    | 1403.99 | 4.5 ± 2.3              | 17.7 ± 2.4 | 3.7 ± 2.6               | 22.6 ± 2.6 | >0.9999          | <0.0001 |
| 70:4                    | 1427.99 | 1.7 ± 0.7              | 1.6 ± 0.7  | 2.2 ± 0.9               | 1.8 ± 0.5  | >0.9999          | >0.9999 |
| 70:3                    | 1430.01 | 1.8 ± 1.3              | 7.0 ± 2.1  | 2.0 ± 1.3               | 11.1 ± 1.7 | >0.9999          | <0.0001 |
| 70:2                    | 1432.02 | 0.5 ± 0.4              | 11.0 ± 3.1 | 0.7 ± 0.3               | 8.4 ± 2.3  | >0.9999          | 0.002   |
| <b>Deoxy-CL species</b> |         |                        |            |                         |            |                  |         |
| 64:4                    | 1327.90 | 9.3 ± 1.9              | 0.8 ± 0.2  | 5.8 ± 2.3               | 0.3 ± 0.3  | 0.2081           | >0.9999 |
| 64:3                    | 1329.92 | 12.7 ± 2.8             | 3.9 ± 1.3  | 16.3 ± 0.8              | 1.8 ± 1.4  | 0.1888           | >0.9999 |
| 64:2                    | 1331.93 | 3.7 ± 1.1              | 1.4 ± 0.6  | 4.8 ± 1.6               | 1.7 ± 1.2  | >0.9999          | >0.9999 |
| 66:5                    | 1353.92 | 6.6 ± 1.8              | 0.5 ± 0.1  | 2.0 ± 1.0               | 0.2 ± 0.1  | 0.0299           | >0.9999 |
| 66:4                    | 1355.93 | 16.2 ± 1.8             | 3.7 ± 0.4  | 15.4 ± 4.3              | 2.0 ± 0.3  | >0.9999          | >0.9999 |
| 66:3                    | 1357.95 | 14.4 ± 1.2             | 14.5 ± 3.5 | 19.2 ± 3.8              | 8.3 ± 1.1  | 0.0236           | 0.005   |
| 68:5                    | 1381.95 | 7.6 ± 0.8              | 1.8 ± 0.4  | 4.7 ± 2.2               | 1.2 ± 0.3  | 0.561            | >0.9999 |
| 68:4                    | 1383.97 | 13.9 ± 2.3             | 10.7 ± 1.1 | 17.3 ± 1.3              | 11.4 ± 1.4 | 0.2831           | >0.9999 |
| 68:3                    | 1385.98 | 7.7 ± 3.1              | 29.3 ± 3.5 | 4.7 ± 5.0               | 36.6 ± 3.2 | 0.502            | 0.0005  |
| 70:5                    | 1409.98 | 3.5 ± 1.1              | 3.1 ± 1.2  | 4.1 ± 1.8               | 3.1 ± 0.8  | >0.9999          | >0.9999 |
| 70:4                    | 1412.00 | 3.5 ± 2.3              | 9.7 ± 7.8  | 4.4 ± 2.8               | 19.3 ± 1.7 | >0.9999          | <0.0001 |
| 70:3                    | 1414.01 | 0.8 ± 0.8              | 20.7 ± 5.2 | 1.5 ± 0.6               | 14.1 ± 3.9 | >0.9999          | 0.0023  |

<sup>a</sup> Percent lipid species. Lipids were analyzed on 3 independently prepared culture extracts (N=3).

MGDG, monoglucosyldiacylglycerol; DGDG, diglucosyldiacylglycerol; PG, phosphatidylglycerol; CL, cardiolipin; Deoxy-CL, putative deoxidised cardiolipin species.

2-way ANOVA, Bonferroni post-test; \*p<0.05; \*\* p<0.01; \*\*\* p<0.001; \*\*\*\*p<0.0001

Primary lipid data are available at <http://dx.doi.org/10.21228/M88C05>.

**Supplementary Table 3. Membrane lipid species.**

| <b>Lipids</b> <sup>a</sup> | <b>Cultivated in</b> |              |                  |              | <b><i>p</i>-value</b>   |              |
|----------------------------|----------------------|--------------|------------------|--------------|-------------------------|--------------|
|                            | <b>THY</b>           |              | <b>THY-Tween</b> |              | <b>THY-Tween vs THY</b> |              |
|                            | <b>WT</b>            | <b>mFabT</b> | <b>WT</b>        | <b>mFabT</b> | <b>WT</b>               | <b>mFabT</b> |
| MGDG                       | 0.2 ± 0.1            | 0.1 ± 0.1    | 0.2 ± 0.1        | 0.2 ± 0.2    | >0.9999                 | >0.9999      |
| DGDG                       | 1.1 ± 0.4            | 0.7 ± 0.2    | 0.7 ± 0.2        | 0.7 ± 0.4    | 0.0803                  | >0.9999      |
| PG                         | 0.7 ± 0.3            | 0.7 ± 0.2    | 0.5 ± 0.1        | 0.7 ± 0.4    | 0.9259                  | >0.9999      |
| CL                         | 1.0 ± 0.6            | 0.4 ± 0.2    | 0.7 ± 0.2        | 0.5 ± 0.3    | 0.3312                  | >0.9999      |
| Total                      | 3.0                  | 1.9          | 2.1              | 2.1          | 0.3126                  | >0.9999      |

<sup>a</sup> Milligrams lipids extracted from the equivalent of OD<sub>600</sub> = 100 (N=4).

MGDG, monoglucosyldiacylglycerol; DGDG, diglucosyldiacylglycerol; PG, phosphatidylglycerol; CL, cardiolipin.

2-way ANOVA, Bonferroni post-test; \*p<0.05.

Source data are provided as a Source Data file.

Supplementary Table 4. Modification of gene expression under all tested conditions.

| Locus         | Gene                 | Gene product                                                               | Adjusted P-values     |                             |                           |                              | Function                      | Adjusted P-values     |                             |                           |                              |
|---------------|----------------------|----------------------------------------------------------------------------|-----------------------|-----------------------------|---------------------------|------------------------------|-------------------------------|-----------------------|-----------------------------|---------------------------|------------------------------|
|               |                      |                                                                            | THY<br>mFabT<br>vs WT | THY-Tween<br>mFabT<br>vs WT | WT<br>THY-Tween<br>vs THY | mFabT<br>THY-Tween<br>vs THY |                               | THY<br>mFabT<br>vs WT | THY-Tween<br>mFabT<br>vs WT | WT<br>THY-Tween<br>vs THY | mFabT<br>THY-Tween<br>vs THY |
| M28_Spy0022   | <i>purC</i>          | Phosphoribosylaminoimidazole-succinocarboxamide synthase, PurC             | 1.327                 |                             |                           |                              | Purine synthesis              | 6.63E-03              |                             |                           |                              |
| M28_Spy0023   | <i>purL</i>          | Phosphoribosylformylglycinamide synthase, PurL                             | 1.245                 |                             |                           |                              | Purine synthesis              | 2.31E-03              |                             |                           |                              |
| M28_Spy0024   | <i>purF</i>          | Amidophosphoribosyltransferase, PurF                                       | 1.102                 |                             |                           |                              | Purine synthesis              | 5.22E-03              |                             |                           |                              |
| M28_Spy0025   | <i>purM</i>          | Phosphoribosylformylglycinamide cyclo-ligase, PurM                         | 1.313                 |                             |                           |                              | Purine synthesis              | 5.22E-03              |                             |                           |                              |
| M28_Spy0026   | <i>purN</i>          | Phosphoribosylglycinamide formyltransferase, PurN                          | 1.469                 |                             |                           |                              | Purine synthesis              | 6.10E-03              |                             |                           |                              |
| M28_Spy0107   | <i>cpa</i>           | Collagen-binding protein, Cpa                                              | 1.937                 |                             |                           |                              | Adhesion                      | 1.60E-09              |                             |                           |                              |
| M28_Spy0108   | <i>stpA</i>          | Signal peptidase I, StpA                                                   | 2.081                 |                             |                           |                              | Signal peptidase              | 3.44E-08              |                             |                           |                              |
| M28_Spy0109   | <i>M28_Spy0109</i>   | T28 T-antigen                                                              | 2.195                 |                             |                           |                              | Adhesion                      | 1.36E-09              |                             |                           |                              |
| M28_Spy0110   | <i>strB</i>          | Class B sortase protein, StrB                                              | 1.734                 |                             |                           |                              | Sortase                       | 3.37E-05              |                             |                           |                              |
| M28_Spy0111   | <i>fbtB</i>          | Pilin minor structural protein, FctB                                       | 1.949                 |                             |                           |                              | Adhesion                      | 2.53E-08              |                             |                           |                              |
| M28_Spy0137*  | <i>nga</i>           | NAD glycohydrolase, Nga                                                    | -1.350                |                             |                           |                              | Virulence factor              | 2.53E-06              |                             |                           |                              |
| M28_Spy0138*  | <i>ifs</i>           | Immunity factor for SPN/NAD glycohydrolase protein, Ifs                    | -1.540                |                             |                           |                              | Resistance factor             | 2.48E-04              |                             |                           |                              |
| M28_Spy0139*  | <i>slo</i>           | Thiol-activated cytolysin, SLO                                             | -1.357                |                             |                           |                              | Virulence factor              | 1.68E-03              |                             |                           |                              |
| M28_Spy0140   | <i>M28_Spy0140</i>   | Uncharacterized protein                                                    | -1.578                |                             | -1.688                    |                              | Unknown function              | 7.30E-05              |                             | 1.41E-04                  |                              |
| M28_Spy0184*  | <i>M28_Spy0184</i>   | RoIA-related transcriptional regulator                                     |                       |                             | -1.082                    |                              | Transcriptional regulator     |                       |                             | 2.09E-06                  |                              |
| M28_Spy0249   | <i>M28_Spy0249</i>   | Transposase*                                                               | -14.443               |                             |                           |                              | Transposition                 | 3.36E-02              |                             |                           |                              |
| M28_Spy0338   | <i>M28_Spy0338</i>   | Uncharacterized protein                                                    | -1.613                | -0.836                      | -1.207                    |                              | Unknown function              | 9.48E-14              | 4.11E-02                    | 2.42E-06                  |                              |
| M28_Spy0341   | <i>M28_Spy0341</i>   | Uncharacterized protein                                                    | -1.689                |                             | -0.895                    |                              | Unknown function              | 2.20E-09              |                             | 3.76E-02                  |                              |
| M28_Spy0346   | <i>M28_Spy0346</i>   | Uncharacterized protein                                                    | -1.475                |                             | -1.011                    |                              | Unknown function              | 1.66E-10              |                             | 4.75E-04                  |                              |
| M28_Spy0371** | <i>M28_Spy0371</i>   | 67 kDa myosin-crossreactive antigen MCRA; fatty acid double bond hydratase | 1.534                 |                             | 1.941                     | 0.588                        | Fatty acid degradation        | 1.67E-19              |                             | 4.26E-26                  | 2.62E-02                     |
| M28_Spy0658   | <i>M28_Spy0658</i>   | 5'-nucleotidase                                                            | 1.187                 |                             |                           |                              | DNA regulation                | 1.16E-03              |                             |                           |                              |
| M28_Spy0757   | <i>M28_Spy0757</i>   | PTS system, mannose/fructose family IIA component                          | -0.996                |                             |                           |                              | Phosphotransferase system     | 4.15E-02              |                             |                           |                              |
| M28_Spy0853** | <i>M28_Spy0853</i>   | Diacetylveicol kinase family lipid kinase                                  | 0.877                 |                             |                           | -1.102                       | Lipid metabolism              | 2.22E-07              |                             |                           | 3.34E-12                     |
| M28_Spy0855** | <i>M28_Spy0855</i>   | Uncharacterized protein                                                    | 1.609                 |                             |                           | -1.969                       | Unknown function              | 6.63E-03              |                             |                           | 2.32E-08                     |
| M28_Spy0977   | <i>phage protein</i> | Hyaluronoglucosaminidase                                                   |                       |                             | 1.594                     |                              | Phage                         | 1.73E-05              |                             | 7.54E-04                  |                              |
| M28_Spy1014   | <i>M28_Spy1014</i>   | Phage DNA/RNA helicase                                                     | 1.028                 |                             |                           |                              | Phage                         | 3.33E-02              |                             |                           |                              |
| M28_Spy1098** | <i>grab</i>          | Protein G-related alpha 2M-binding protein, Grab                           | 1.647                 |                             |                           |                              | Virulence factor              | 5.01E-03              |                             |                           |                              |
| M28_Spy1112** | <i>gapN</i>          | NADP-dependent glyceraldehyde-3-phosphate dehydrogenase, GapN              | -1.220                |                             | -0.740                    |                              | Glycolysis                    | 2.53E-08              |                             |                           |                              |
| M28_Spy1136   | <i>M28_Spy1136</i>   | D-alanyl-D-alanine carboxypeptidase                                        | 1.633                 |                             | 0.917                     |                              | Peptidoglycan biosynthesis    | 1.89E-17              |                             | 1.89E-04                  |                              |
| M28_Spy1137   | <i>M28_Spy1137</i>   | Uncharacterized protein                                                    | 1.596                 |                             |                           |                              | Unknown function              | 8.69E-03              |                             |                           |                              |
| M28_Spy1138   | <i>M28_Spy1138</i>   | Uncharacterized protein                                                    | 1.767                 |                             |                           |                              | Unknown function              | 5.64E-03              |                             |                           |                              |
| M28_Spy1147*  | <i>kup</i>           | Probable potassium transport system protein, Kup                           | 2.234                 |                             |                           | -0.854                       | Transporter                   | 6.46E-17              |                             |                           | 6.13E-02                     |
| M28_Spy1228   | <i>M28_Spy1228</i>   | Phage protein                                                              |                       |                             | 1.361                     |                              | Phage                         |                       |                             | 4.08E-03                  |                              |
| M28_Spy1229   | <i>M28_Spy1229</i>   | Phage protein                                                              |                       |                             | 1.061                     |                              | Phage                         |                       |                             | 9.75E-03                  |                              |
| M28_Spy1234   | <i>M28_Spy1234</i>   | Phage endopeptidase                                                        |                       |                             | 1.082                     |                              | Phage                         |                       |                             | 4.28E-02                  |                              |
| M28_Spy1236   | <i>M28_Spy1236</i>   | Phage protein                                                              |                       |                             | 1.223                     |                              | Phage                         |                       |                             | 1.10E-02                  |                              |
| M28_Spy1237   | <i>M28_Spy1237</i>   | Phage protein                                                              |                       |                             | 1.160                     |                              | Phage                         |                       |                             | 1.80E-02                  |                              |
| M28_Spy1238   | <i>M28_Spy1238</i>   | Phage protein                                                              |                       |                             | 1.240                     |                              | Phage                         |                       |                             | 2.53E-02                  |                              |
| M28_Spy1239   | <i>M28_Spy1239</i>   | Major tail shaft protein                                                   |                       |                             | 1.302                     |                              | Phage                         |                       |                             | 4.08E-03                  |                              |
| M28_Spy1244   | <i>M28_Spy1244</i>   | Major head protein                                                         |                       |                             | 1.258                     |                              | Phage                         |                       |                             | 8.34E-03                  |                              |
| M28_Spy1245   | <i>M28_Spy1245</i>   | Phage protein                                                              |                       |                             | 1.199                     |                              | Phage                         |                       |                             | 1.22E-02                  |                              |
| M28_Spy1249   | <i>M28_Spy1249</i>   | Minor capsid protein                                                       |                       |                             | 1.126                     |                              | Phage                         |                       |                             | 7.22E-03                  |                              |
| M28_Spy1251   | <i>M28_Spy1251</i>   | Phage protein                                                              |                       |                             | 1.225                     |                              | Phage                         |                       |                             | 2.42E-02                  |                              |
| M28_Spy1255   | <i>M28_Spy1255</i>   | ParB-like protein                                                          |                       |                             | 1.219                     |                              | Phage                         |                       |                             | 8.34E-03                  |                              |
| M28_Spy1336   | <i>M28_Spy1336</i>   | R28 protein GAS-specific adhesin                                           | 1.041                 |                             | 1.412                     |                              | Adhesin                       | 5.22E-03              |                             | 1.42E-04                  |                              |
| M28_Spy1434   | <i>M28_Spy1434</i>   | DegV family protein, FakB3, fatty acid metabolism                          |                       |                             | -1.491                    | -1.409                       | Lipid metabolism              |                       |                             | 3.12E-07                  | 4.29E-08                     |
| M28_Spy1473** | <i>accD</i>          | Acetyl-coenzyme A carboxylase carboxyl transferase subunit alpha, AccD     |                       | 2.567                       | -2.343                    |                              | Fatty acid biosynthesis       |                       | 6.07E-15                    | 7.81E-15                  |                              |
| M28_Spy1474** | <i>accA</i>          | Acetyl-coenzyme A carboxylase carboxyl transferase subunit beta, AccA      |                       | 2.589                       | -2.357                    |                              | Fatty acid biosynthesis       |                       | 9.75E-12                    | 1.07E-11                  |                              |
| M28_Spy1475** | <i>accC</i>          | Biotin carboxylase, AccC                                                   |                       | 2.666                       | -2.431                    |                              | Fatty acid biosynthesis       |                       | 2.61E-11                    | 3.01E-11                  |                              |
| M28_Spy1476** | <i>fabZ</i>          | 3-hydroxyacyl-[acyl-carrier-protein] dehydratase, FabZ                     |                       | 2.559                       | -2.335                    |                              | Fatty acid biosynthesis       |                       | 1.65E-09                    | 2.29E-09                  |                              |
| M28_Spy1477** | <i>accB</i>          | Biotin carboxyl carrier protein of acetyl-CoA carboxylase, AccB            |                       | 2.534                       | -2.535                    |                              | Fatty acid biosynthesis       |                       | 3.23E-11                    | 2.47E-13                  |                              |
| M28_Spy1478** | <i>fabF</i>          | 3-oxoacyl-[acyl-carrier-protein] synthase 2, FabF                          |                       | 2.601                       | -2.524                    |                              | Fatty acid biosynthesis       |                       | 3.81E-32                    | 2.09E-36                  |                              |
| M28_Spy1479** | <i>fabG</i>          | 3-oxoacyl-[acyl-carrier-protein] reductase, FabG                           |                       | 2.676                       | -2.486                    |                              | Fatty acid biosynthesis       |                       | 1.78E-24                    | 2.96E-25                  |                              |
| M28_Spy1480** | <i>fabD</i>          | Malonyl CoA-acyl carrier protein transacylase, FabD                        |                       | 2.434                       | -2.430                    |                              | Fatty acid biosynthesis       |                       | 3.83E-21                    | 2.96E-25                  |                              |
| M28_Spy1481** | <i>fabK*</i>         | Enoyl-[acyl-carrier-protein] reductase (NADH), FabK                        |                       | 2.351                       | -2.397                    |                              | Fatty acid biosynthesis       |                       | 7.62E-10                    | 3.35E-12                  |                              |
| M28_Spy1483   | <i>fabH</i>          | 3-oxoacyl-[acyl-carrier-protein] synthase 3, FabH                          | 0.679                 |                             | -1.176                    |                              | Fatty acid biosynthesis       |                       | 9.91E-02                    | 3.40E-07                  |                              |
| M28_Spy1484   | <i>fabT</i>          | Transcriptional regulator, FabT                                            |                       |                             | -0.921                    |                              | Fatty acid biosynthesis       |                       |                             | 4.22E-02                  |                              |
| M28_Spy1485*  | <i>fabM*</i>         | Enoyl-CoA hydratase, FabM                                                  |                       |                             | -1.160                    |                              | Fatty acid biosynthesis       |                       |                             | 2.67E-02                  |                              |
| M28_Spy1562** | <i>uspA</i>          | Universal stress protein family, UspA                                      | -1.740                | -4.066                      | 1.843                     |                              | Stress response               | 3.88E-03              | 1.13E-11                    | 4.08E-03                  |                              |
| M28_Spy1563** | <i>norA</i>          | Quinolone resistance protein, NorA                                         | -1.288                | -3.229                      | 1.529                     |                              | Antibiotic resistance         | 6.14E-06              | 2.22E-26                    | 4.97E-07                  |                              |
| M28_Spy1638** | <i>fakB4</i>         | DegV family protein, FakB4                                                 |                       | 0.835                       | -1.083                    |                              | Fatty acid storage-catabolism |                       | 8.71E-03                    | 2.09E-06                  |                              |
| M28_Spy1672** | <i>ska</i>           | Streptokinase, Ska                                                         | 0.929                 |                             | 1.069                     |                              | Tissue invasion               | 9.29E-03              |                             | 6.66E-03                  |                              |
| M28_Spy1675   | <i>sclA/scl1</i>     | Collagen-like surface protein A, SclA/Scl1                                 | -1.823                |                             | -0.996                    |                              | Adhesion                      | 9.80E-09              |                             | 3.86E-02                  |                              |
| M28_Spy1699** | <i>M28_Spy1699</i>   | Cell surface protein                                                       | -0.923                |                             | -1.822                    |                              | Adhesion                      | 3.36E-02              |                             | 4.97E-07                  |                              |
| M28_Spy1700** | <i>scpA</i>          | C5a peptidase, ScpA                                                        | -1.162                |                             | -2.073                    |                              | Adhesion                      | 2.92E-03              |                             | 7.84E-09                  |                              |
| M28_Spy1701   | <i>M28_Spy1701</i>   | Emn protein                                                                | -0.871                |                             | -1.026                    |                              | Adhesion                      | 4.49E-02              |                             | 2.55E-02                  |                              |
| M28_Spy1702   | <i>M28_Spy1702</i>   | M28 protein                                                                | -1.985                |                             |                           |                              | Adhesion                      | 1.22E-07              |                             |                           |                              |
| M28_Spy1715   | <i>sfbX</i>          | Fibronectin-binding protein, SfbX                                          | -0.889                |                             | -1.359                    |                              | Adhesion                      | 5.22E-03              |                             | 5.78E-06                  |                              |
| M28_Spy1716   | <i>saf</i>           | Serum opacity factor                                                       | -1.093                |                             | -1.375                    |                              | Adhesion                      | 1.93E-05              |                             | 4.29E-07                  |                              |
| M28_Spy1813   | <i>M28_Spy1813</i>   | Phage protein                                                              | -1.491                |                             |                           |                              | Phage                         | 1.98E-04              |                             |                           |                              |
| M28_Spy1838** | <i>M28_Spy1838</i>   | Phage protein                                                              | 2.661                 | 1.618                       | 3.203                     | 2.160                        | Phage                         | 1.77E-31              | 6.00E-08                    | 1.24E-37                  | 2.28E-22                     |

Gene expression was considered modified in a given condition when the absolute value of log<sub>2</sub>-Foldchange (FC) was greater than or equal to 1, with an adjusted p-value ≤ 0.05. \* Genetic loci in red were validated by qRT-PCR (Supplementary Figure 4c). \* Differences in *fabK* and *fabM* expression in THY were below the significance threshold by transcriptomics, and were therefore examined by qRT-PCR (Supplementary Fig. 4a). Asterisks highlight genes for which expression changes match those from a previous transcriptomic analysis of a GAS *fabT* deleted mutant vs WT strain cultivated at different temperatures: 35 °C (blue asterisk) and 40 °C (red asterisk) in exponential phase. In italics, log<sub>2</sub>-fold changes that are less than our log<sub>2</sub>-fold threshold but have a p-value below 0.05 and are significantly modified in published comparisons<sup>1</sup>. In bold are the genes referred to in the text. Source data are provided as a Source Data file (also for Fig 2b-e).

1. Eraso, J. M. et al. Genomic Landscape of Intrahost Variation in Group A Streptococcus: Repeated and Abundant Mutational Inactivation of the *fabT* Gene Encoding a Regulator of Fatty Acid Synthesis. Infect Immun 84, 3268-3281, doi:10.1128/IAI.00608-16 (2016).

Supplementary Table 5. Metabolites present in the different media tested.

| Metabolites        | LOD* [µM] | Infection medium (RPMI) |      |      | Conditioned supernatants (SN) |             |             | SN inoculated with |      |       |                  |      |       |                |             |              |                   |             |             |
|--------------------|-----------|-------------------------|------|------|-------------------------------|-------------|-------------|--------------------|------|-------|------------------|------|-------|----------------|-------------|--------------|-------------------|-------------|-------------|
|                    |           |                         |      |      |                               |             |             | WT strain 8 h      |      |       | mFabT strain 8 h |      |       | WT strain 16 h |             |              | mFabT strain 16 h |             |             |
|                    |           | 1                       | 2    | 3    | 1                             | 2           | 3           | 1                  | 2    | 3     | 1                | 2    | 3     | 1              | 2           | 3            | 1                 | 2           | 3           |
| <b>Amino acids</b> |           |                         |      |      |                               |             |             |                    |      |       |                  |      |       |                |             |              |                   |             |             |
| Asn                | 102       | 290                     | 242  | 320  | <b>375</b>                    | <b>375</b>  | <b>353</b>  | 392                | 328  | 381   | 394              | 378  | 352   | <b>371</b>     | <b>351</b>  | <b>381</b>   | <b>341</b>        | <b>301</b>  | <b>304</b>  |
| Asp                | 153       | 121                     | 103  | 134  | 155                           | 158         | 154         | 162                | 165  | 168   | 170              | 175  | 164   | 211            | 163         | 183          | 174               | 182         | 189         |
| Gly                | 103       | 104                     | 90   | 115  | <b>180</b>                    | <b>180</b>  | <b>173</b>  | 185                | 164  | 180   | 185              | 186  | 175   | 190            | 167         | 181          | 172               | 160         | 165         |
| His                | 20.1      | 66.9                    | 56.6 | 73.3 | 85.5                          | 86.4        | 82.5        | 93.6               | 83.5 | 89.6  | 91.8             | 91.3 | 87.5  | 92.1           | 82.4        | 89.9         | 83.4              | 80          | 82.1        |
| Ile                | 205       | 305                     | 255  | 332  | <b>344</b>                    | <b>357</b>  | <b>333</b>  | 369                | 328  | 365   | 357              | 367  | 348   | <b>374</b>     | <b>330</b>  | <b>371</b>   | <b>332</b>        | <b>307</b>  | <b>328</b>  |
| Lys                | 104       | 160                     | 133  | 169  | <b>200</b>                    | <b>199</b>  | <b>197</b>  | 213                | 188  | 210   | 211              | 218  | 200   | <b>216</b>     | <b>195</b>  | <b>214</b>   | <b>190</b>        | <b>183</b>  | <b>187</b>  |
| Met                | 44.6      | 45.9                    | 39.5 | 51.1 | 60.2                          | 59.5        | 58.6        | 63.6               | 55.7 | 63.9  | 63.8             | 64.7 | 61.4  | 66.6           | 57.5        | 63.5         | 59.2              | 56.4        | 58.7        |
| Pro                | 93.8      | 127                     | 107  | 136  | 159                           | 161         | 154         | 169                | 152  | 165   | 165              | 173  | 163   | 169            | 155         | 173          | 155               | 148         | 153         |
| Ser                | 156       | 215                     | 183  | 228  | 198                           | 210         | 200         | 226                | 196  | 217   | 224              | 229  | 215   | <b>223</b>     | <b>206</b>  | <b>220</b>   | <b>202</b>        | <b>192</b>  | <b>198</b>  |
| Thr                | 116       | 130                     | 109  | 140  | 164                           | 167         | 158         | 172                | 156  | 173   | 170              | 172  | 169   | 177            | 155         | 173          | 158               | 151         | 153         |
| Tyr                | 42.2      | 77.2                    | 66.1 | 83.4 | 97.8                          | 98.9        | 95.6        | 103                | 92.4 | 103   | 105              | 105  | 99.8  | 108            | 94          | 105          | 93.8              | 90.6        | 93.8        |
| Kynurenine         | 0.285     | 1.1                     | 0.87 | 1.21 | 1.4                           | 1.5         | 1.44        | 1.53               | 1.44 | 1.52  | 1.55             | 1.63 | 1.42  | 1.59           | 1.45        | 1.61         | 1.36              | 1.43        | 1.39        |
| Met-SO             | 27.9      | 29                      | 24.4 | 31   | 34.1                          | 35.2        | 33.7        | 37                 | 34.4 | 36.9  | 36.5             | 37.4 | 36    | 36.8           | 34.4        | 37.4         | 33.4              | 32.5        | 32.9        |
| <b>Sugar</b>       |           |                         |      |      |                               |             |             |                    |      |       |                  |      |       |                |             |              |                   |             |             |
| Hexoses            | 529       | 8212                    | 6915 | 8642 | <b>9672</b>                   | <b>9746</b> | <b>9962</b> | 10393              | 9172 | 10093 | 10243            | 9859 | 10215 | <b>10244</b>   | <b>9217</b> | <b>10213</b> | <b>9411</b>       | <b>8581</b> | <b>8967</b> |

\* LOD: limit of detection Results of independent triplicates (1, 2, and 3) are shown. Values are all in µM. In bold, metabolites produced by uninfected cells. In red, products that were consumed more in mFabT- than in WT- depleted conditioned supernatants. Source data are available at <http://dx.doi.org/10.21228/M88C05>.

**Supplementary Table 6. Bacterial growth in the presence of platensimycin (1  $\mu\text{g}/\text{mL}$ )<sup>a</sup>**

|                             | <b>OD<sub>600</sub> at 4 h</b> |                 |
|-----------------------------|--------------------------------|-----------------|
|                             | <b>WT</b>                      | <b>mFabT</b>    |
| BHI+BSA                     | 1.05 $\pm$ 0.13                | 1.03 $\pm$ 0.22 |
| BHI+BSA+Platensimycin       | 0.34 $\pm$ 0.05                | 0.91 $\pm$ 0.18 |
| BHI+BSA+C17:1               | 1.38 $\pm$ 0.19                | 1.28 $\pm$ 0.21 |
| BHI+BSA+C17:1+Platensimycin | 1.37 $\pm$ 0.19                | 1.23 $\pm$ 0.19 |

<sup>a</sup> Bacteria were grown in indicated conditions starting from an overnight BHI culture and then diluted to an initial OD<sub>600</sub> = 0.05 (N=3, corresponding to 3 independent culture samples). Medium was BHI supplemented with FA-free BSA (0.025 %), to which Platensimycin (1  $\mu\text{g}/\text{mL}$ ) and C17:1 100  $\mu\text{M}$  were added when indicated.

Source data are provided as a Source Data file.

Supplementary Table 7. Strains and plasmids used in this study.

| Strains or plasmids                  | Relevant properties                                                                                                                                                                                                            | Source or reference   |
|--------------------------------------|--------------------------------------------------------------------------------------------------------------------------------------------------------------------------------------------------------------------------------|-----------------------|
| <b><i>Streptococcus pyogenes</i></b> |                                                                                                                                                                                                                                |                       |
| WT                                   | Wild-type representative <i>emm28</i> clinical isolate, M28PF1                                                                                                                                                                 | 1                     |
| CCH1718                              | M28PF1 derivative harboring multiple mutations including the replacement in <i>fabT</i> of C313 by T encoding the FabT <sup>H105Y</sup> polymorphism                                                                           | Laboratory collection |
| $\Delta fabT$                        | M28PF1 deleted for <i>fabT</i>                                                                                                                                                                                                 | This study            |
| mFabT                                | M28PF1 mutated in <i>fabT</i> C313T (FabT <sup>H105Y</sup> )                                                                                                                                                                   | 2                     |
| WT <sup>eryR-igfp</sup>              | M28PF1 with the integrated pG1-lacA-PTetO-gfp containing an erythromycin resistance cassette                                                                                                                                   | 3                     |
| mFabT <sup>eryR-igfp</sup>           | mFabT with the integrated pG1-lacA-PTetO-gfp containing an erythromycin resistance cassette                                                                                                                                    | This study            |
| <b><i>Escherichia coli</i></b>       |                                                                                                                                                                                                                                |                       |
| Stellar <sup>TM</sup>                | F-, <i>endA1</i> , <i>supE44</i> , <i>thi-1</i> , <i>recA1</i> , <i>gyrA96</i> , <i>phoA</i> , $\Phi 80d$ <i>lacZ</i> $\Delta$ M15, $\Delta(lacZYA - argF)$ U169, $\Delta(mrr - hsdRMS - mcrBC)$ , $\Delta mcrA$ , $\lambda$ - | Clontech              |
| <b>Plasmids</b>                      |                                                                                                                                                                                                                                |                       |
| pG1                                  | thermosensitive broad-host-range vector                                                                                                                                                                                        | 4                     |
| pG1- $\Delta fabT$                   | pG1- $\Delta fabT$ construct for <i>fabT</i> deletion in <i>S. pyogenes</i>                                                                                                                                                    | This study            |
| pG1-lacAPTetO-gfp                    | pG1-lacA-Perm-gfp with the Erm promoter replaced by the tetO tetR P <sub>xyl</sub> promoter of pTCV_TetO. Can be integrated in <i>S. pyogenes</i> genome for anhydrotetracycline inducible <i>gfp</i> expression               | 3                     |

1. Longo, M. et al. Complete Genome Sequence of *Streptococcus pyogenes* *emm28* Clinical Isolate M28PF1, Responsible for a Puerperal Fever. *Genome Announc* 3, doi:10.1128/genomeA.00750-15 (2015).
2. Lambert, C. et al. A *Streptococcus pyogenes* DegV protein regulates the membrane lipid content and limits the formation of extracellular vesicles. *PLoS One* 18, e0284402, doi:10.1371/journal.pone.0284402 (2023).
3. Weckel, A. et al. *Streptococcus pyogenes* infects human endometrium by limiting the innate immune response. *J Clin Invest* 131, doi:10.1172/JCI130746 (2021).
4. Biswas, I., Gruss, A., Ehrlich, S. D. & Maguin, E. High-efficiency gene inactivation and replacement system for gram-positive bacteria. *J Bacteriol* 175, 3628-3635, doi:10.1128/jb.175.11.3628-3635.1993 (1993).

Supplementary Table 8. Primers used in this study for cloning, clone verifications, PCR, and qRT-PCR experiments.

| Primer name  | Sequence                             | Used for                                                       |
|--------------|--------------------------------------|----------------------------------------------------------------|
| P47          | CGCCAGGGTTTTCCAGTCACGAC              | Plasmid construction for $\Delta fabT$ strain                  |
| RP48         | AGCGGATAACAATTTACACAGGA              | Plasmid construction for $\Delta fabT$ strain                  |
| ermB-F       | GAGTGTGTTGATAGTGCAGT                 | Plasmid construction for $\Delta fabT$ strain                  |
| ermB-R       | TAGGCGCTAGGGACCTCTTTA                | Plasmid construction for $\Delta fabT$ strain                  |
| FabTavF      | GATATTTTCAACCGGGCGTGGACTAGGGAATCTAC  | Plasmid construction for $\Delta fabT$ strain                  |
| FabTavR2     | CCATGATTACGAATTCGCACCATCTGTGTGTAAT   | Plasmid construction for $\Delta fabT$ strain                  |
| FabTamR      | CCGGTTGAAAATATCAACTAAGTATT           | Plasmid construction for $\Delta fabT$ strain                  |
| FabTamF2     | CGACTCTAGAGGATCCGCCAAAACCTAGTCATCCTT | Plasmid construction for $\Delta fabT$ strain                  |
| PFabTamEco   | ATATAGAATTCGGCAGAGCTTGCTACTTCAAGA    | PCR overlapping <i>fabM</i> and <i>fabT</i>                    |
| PFabTavBam   | ATAGGATCCGCAAGATCATCTACAACATCA       | PCR overlapping <i>fabM</i> and <i>fabT</i>                    |
| fabH_acpP_Am | GGGACAGATTAGGTTAGATGGT               | PCR overlapping <i>fabH</i> and <i>acpA</i>                    |
| fabH_acpP_Av | GCGTTACTTCTTCTGTCTCCTT               | PCR overlapping <i>fabH</i> and <i>acpA</i>                    |
| acpP_fabK_Am | GGTGACCTTGTTGCTTA                    | PCR overlapping <i>acpA</i> and <i>fabK</i>                    |
| acpP_fabK_Av | CCATTCCTCCTTGAAAA                    | PCR overlapping <i>acpA</i> and <i>fabK</i>                    |
| fabZ_accC_Am | GCAGCAAGTGGAAACATTAA                 | PCR overlapping <i>fabZ</i> and <i>accC</i>                    |
| fabZ_accC_Av | CACCACGATTAGCAATTAA                  | PCR overlapping <i>fabZ</i> and <i>accC</i>                    |
| accD-end     | GCGTTACCAACGCTTTCGTAAA               | PCR overlapping <i>accD</i> and <i>serS</i>                    |
| serS-end     | GGCGAAACCGTCATTTACCT                 | PCR overlapping <i>accD</i> and <i>serS</i>                    |
| FabT-222     | GGTCTGGCAAAGCTTTTTCA                 | Identification of spontaneous <i>fabT</i> mutants              |
| FabTavComp   | GGCGTTCTGCTATTCCTGTT                 | Identification of spontaneous <i>fabT</i> mutants              |
| rofA-Am      | GGCGTTAAATTGTGCAAGATACTGC            | qRT-PCR of M28_ <i>Spy0184</i> coding for RofA                 |
| rofA-Av      | CCTACTGGCTATTTTGTGACAGAA             | qRT-PCR of M28_ <i>Spy0184</i> coding for RofA                 |
| 0371-Am      | GCCGATTTCTGATCTACCCCTT               | qRT-PCR of M28_ <i>Spy0371</i>                                 |
| 0371-Av      | GCCCTTACCTTTGGAGTGATGA               | qRT-PCR of M28_ <i>Spy0371</i>                                 |
| 0853_Am      | GCCAACATGGTTTTTCCGAA                 | qRT-PCR of M28_ <i>Spy0853</i>                                 |
| 0853_Av      | GGGATAACCAAGTCAATCTT                 | qRT-PCR of M28_ <i>Spy0853</i>                                 |
| 1136-Am      | CCGGATATGCAAGAATATTCCTT              | qRT-PCR of M28_ <i>Spy1136</i>                                 |
| 1136-Av      | CCCCTAGCGGTCAAATAATTGGT              | qRT-PCR of M28_ <i>Spy1136</i>                                 |
| R28-Am       | GGGCGCAATTACCTTTACTGCAA              | qRT-PCR of M28_ <i>Spy1336</i> coding for R28                  |
| R28-Av       | CCGTTTGGTCCTTACCTTTTGTT              | qRT-PCR of M28_ <i>Spy1336</i> coding for R28                  |
| 1434-Am      | CCCTACAGATTGGCACAGAAAT               | qRT-PCR of M28_ <i>Spy1434</i> coding for FakB3                |
| 1434-Av      | GGGCTTGACAGCTAGATGT                  | qRT-PCR of M28_ <i>Spy1434</i> coding for FakB3                |
| 1562-Am      | GCACGTTTAGATACATGACAATTGG            | qRT-PCR of M28_ <i>Spy1562</i> coding for UspA                 |
| 1562-Av      | GCTCTCACGATCAACAGATCAAT              | qRT-PCR of M28_ <i>Spy1562</i> coding for UspA                 |
| norA-Am      | GTGGCCATCACAGTAATAAACTTT             | qRT-PCR of M28_ <i>Spy1563</i> coding for NorA                 |
| norA-Av      | CCCTGTTGCCAATCCTGCCT                 | qRT-PCR of M28_ <i>Spy1563</i> coding for NorA                 |
| 1638-Am      | GCCAGCTTTCATCTTTTTCAAAAGG            | qRT-PCR of M28_ <i>Spy1638</i> coding for FakB4                |
| 1638-Av      | GGGCAGAAGATCATGATATTGTC              | qRT-PCR of M28_ <i>Spy1638</i> coding for FakB4                |
| ska-Am       | CCGTCCATCTGTCAACAACAGCCA             | qRT-PCR of M28_ <i>Spy1672</i> coding for Ska                  |
| ska-Av       | CCTCCATGAGCAGGTTGTGATGTT             | qRT-PCR of M28_ <i>Spy1672</i> coding for Ska                  |
| esp-Am       | GGCTGCATGCTATCTACGGCA                | qRT-PCR of M28_ <i>Spy1699</i> coding for Cell Surface protein |
| esp-Av       | GCCGCTATTCCATTCGAAACT                | qRT-PCR of M28_ <i>Spy1699</i> coding for Cell Surface protein |
| scpA-Am      | GGGGGTCTACGGCTTGTTT                  | qRT-PCR of M28_ <i>Spy1700</i> coding for ScpA                 |
| scpA-Av      | GCGCTCATGTCTACGAGCAT                 | qRT-PCR of M28_ <i>Spy1700</i> coding for ScpA                 |
| sfbX-Am      | GGGGCTTGAAACTCGGTGTT                 | qRT-PCR of M28_ <i>Spy1715</i> coding for SfbX                 |
| sfbX-Av      | GGCCAAGTCTGGGACCCACT                 | qRT-PCR of M28_ <i>Spy1715</i> coding for SfbX                 |
| sof-Am       | GGGGTGAGGCTGGAGTAGTG                 | qRT-PCR of M28_ <i>Spy1716</i> coding for SOF                  |
| sof-Av       | GCAGCTGGGAGCGGAGCTA                  | qRT-PCR of M28_ <i>Spy1716</i> coding for SOF                  |
| gyrA1        | GCCATGAGTGTCAATTGTGGC                | qRT-PCR of <i>gyrA</i>                                         |
| gyrA2        | GGCGATAACTCCACCACTGA                 | qRT-PCR of <i>gyrA</i>                                         |
